# Supplementary material
Source: Springer Nature journal article supplement (https://www.springermedizin.de/resource/supplementary/12985_2010_803_MOESM2_ESM.pdf/9609230)

A

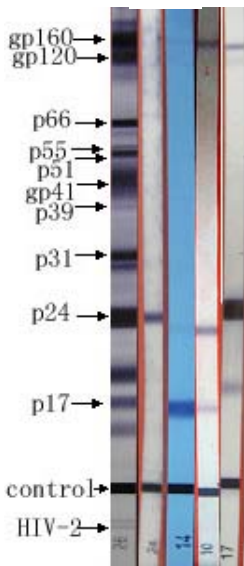

B

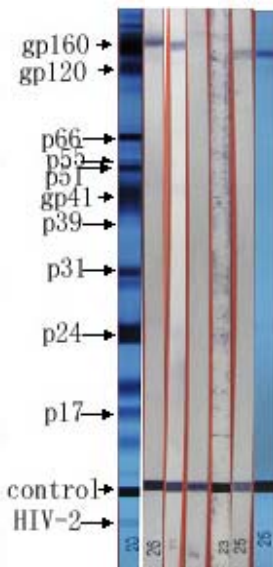

C

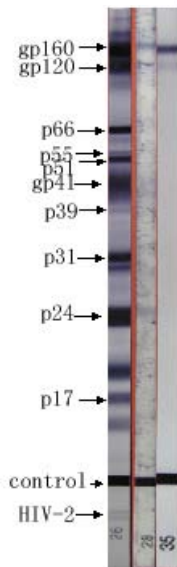

Supplement: MOESM2 [file 9609230]
